# Supplementary material for: Identification and validation of RNA binding protein-associated prognostic model for Neuroblastoma
Source: Research Square preprint supplement (doi:10.21203/rs.3.rs-117557/v1), 2021-01-07
Supplement: Supplementary file 1 [file 294241d6d509e11578987dba.docx]

Table2 Pathway analysis by KEGG.

| ID | Description | pvalue | geneID | Count |
| --- | --- | --- | --- | --- |
| hsa03015 | mRNA surveillance pathway | 1.31E-14 | MSI1/MSI2/GSPT2/CLP1/NXF2B/NXF2/NXF3/SRRM1/CSTF2/CSTF2T/PCF11/PABPC3/PABPC1L2A/PABPC1L2B/SMG6/PAPOLB/RNGTT | 17 |
| hsa03013 | RNA transport | 1.32E-14 | RPP25/EIF4A1/NXF2B/NXF2/NXF3/POP7/SNUPN/GEMIN6/EIF3C/EIF3CL/POP4/SRRM1/EIF1AY/EEF1A2/SMN1/SMN2/PABPC3/PABPC1L2A/PABPC1L2B/POP1/EIF4E1B/EIF4E | 22 |
| hsa03008 | Ribosome biogenesis in eukaryotes | 7.89E-10 | REXO2/RBM28/RPP25/RCL1/PWP2/EMG1/NXF2B/NXF2/NXF3/POP7/BMS1/POP4/UTP14C/POP1 | 14 |
| hsa03018 | RNA degradation | 2.28E-07 | PNLDC1/EXOSC7/EXOSC6/LSM3/CNOT2/PABPC3/PABPC1L2A/PABPC1L2B/CNOT6/WDR61 | 10 |
| hsa03010 | Ribosome | 3.70E-06 | RPS27L/RPL10L/RPS29/RPL17/MRPS18C/MRPL22/RPL3L/MRPL14/RPL22L1/RPL36A/MRPS6/MRPL23 | 12 |
| hsa00970 | Aminoacyl-tRNA biosynthesis | 5.44E-06 | DARS2/PSTK/SARS2/PARS2/AARS2/CARS2/FARSB/MARS2 | 8 |
| hsa03040 | Spliceosome | 7.19E-05 | CDC5L/LSM3/PRPF6/U2AF1/U2AF1L4/RBMXL3/HNRNPA1L2/HNRNPCL1/PPIE/PRPF40B | 10 |
| hsa03020 | RNA polymerase | 0.001088 | POLR2J2/POLR2J3/POLR2D/POLR2F | 4 |
| hsa05164 | Influenza A | 0.003824 | OAS2/OAS3/NXF2B/NXF2/NXF3/EIF2AK2/TLR7/TLR3 | 8 |
