# Supplementary material for: Identification and validation of RNA binding protein-associated prognostic model for Neuroblastoma
Source: Research Square preprint supplement (doi:10.21203/rs.3.rs-117557/v1), 2021-01-07
Supplement: Supplementary file 2 [file c3fcb6aa39ec5ea9cee0236a.docx]

Table3 Two hub RBPs identifed from Cox regression analysis from TARGET dataset

| id | coef | HR | HR.95L | HR.95H | pvalue |
| --- | --- | --- | --- | --- | --- |
| CPEB3 | -0.60901 | 0.543889 | 0.34522 | 0.856888 | 0.008642 |
| CTU1 | 0.851637 | 2.34348 | 1.528648 | 3.59265 | 9.35E-05 |
